# Supplementary material
Source: ML conference proceedings conference paper supplement (https://proceedings.mlr.press/v80/huo18a.html)
Supplement: Supplementary file [file huo18a-supp.pdf]

---

# Supplementary Materials for Paper “Decoupled Parallel Backpropagation with Convergence Guarantee”

---

Zhouyuan Huo Bin Gu Qian Yang Heng Huang<sup>1</sup>

## A. Proof to Lemma 1

*Proof:* Because the gradient of  $f(w)$  is Lipschitz continuous in Assumption 1, the following inequality holds that:

$$f(w^{t+1}) \leq f(w^t) + \nabla f(w^t)^T (w^{t+1} - w^t) + \frac{L}{2} \|w^{t+1} - w^t\|_2^2. \quad (1)$$

From the update rule in Algorithm 1, we take expectation on both sides and obtain:

$$\begin{aligned} \mathbb{E} [f(w^{t+1})] &\leq f(w^t) - \gamma_t \mathbb{E} \left[ \nabla f(w^t)^T \left( \sum_{k=1}^K \nabla f_{\mathcal{G}(k), x_{i(t-K+k)}} (w^{t-K+k}) \right) \right] \\ &\quad + \frac{L\gamma_t^2}{2} \mathbb{E} \left\| \sum_{k=1}^K \nabla f_{\mathcal{G}(k), x_{i(t-K+k)}} (w^{t-K+k}) \right\|_2^2 \\ &\leq f(w^t) - \gamma_t \sum_{k=1}^K \nabla f(w^t)^T (\nabla f_{\mathcal{G}(k)} (w^{t-K+k}) + \nabla f_{\mathcal{G}(k)} (w^t) - \nabla f_{\mathcal{G}(k)} (w^t)) \\ &\quad + \frac{L\gamma_t^2}{2} \mathbb{E} \left\| \sum_{k=1}^K \nabla f_{\mathcal{G}(k), x_{i(t-K+k)}} (w^{t-K+k}) - \nabla f(w^t) + \nabla f(w^t) \right\|_2^2 \\ &= f(w^t) - \gamma_t \|\nabla f(w^t)\|_2^2 - \gamma_t \sum_{k=1}^K \nabla f(w^t)^T (\nabla f_{\mathcal{G}(k)} (w^{t-K+k}) - \nabla f_{\mathcal{G}(k)} (w^t)) \\ &\quad + \frac{L\gamma_t^2}{2} \|\nabla f(w^t)\|_2^2 + \frac{L\gamma_t^2}{2} \mathbb{E} \left\| \sum_{k=1}^K \nabla f_{\mathcal{G}(k), x_{i(t-K+k)}} (w^{t-K+k}) - \nabla f(w^t) \right\|_2^2 \\ &\quad + L\gamma_t^2 \sum_{k=1}^K \nabla f(w^t)^T (\nabla f_{\mathcal{G}(k)} (w^{t-K+k}) - \nabla f_{\mathcal{G}(k)} (w^t)) \\ &= f(w^t) - \left( \gamma_t - \frac{L\gamma_t^2}{2} \right) \|\nabla f(w^t)\|_2^2 + \underbrace{\frac{L\gamma_t^2}{2} \mathbb{E} \left\| \sum_{k=1}^K \nabla f_{\mathcal{G}(k), x_{i(t-K+k)}} (w^{t-K+k}) - \nabla f(w^t) \right\|_2^2}_{Q_1} \\ &\quad - \underbrace{\left( \gamma_t - L\gamma_t^2 \right) \sum_{k=1}^K \nabla f(w^t)^T (\nabla f_{\mathcal{G}(k)} (w^{t-K+k}) - \nabla f_{\mathcal{G}(k)} (w^t))}_{Q_2}, \end{aligned} \quad (2)$$

---

<sup>1</sup>Department of Electrical and Computer Engineering, University of Pittsburgh, Pittsburgh, United States. Correspondence to: Heng Huang <heng.huang@pitt.edu>.

where the second inequality follows from the unbiased gradient  $\mathbb{E}[\nabla f_{x_i}(w)] = \nabla f(w)$ . Because of  $\|x + y\|_2^2 \leq 2\|x\|_2^2 + 2\|y\|_2^2$  and  $xy \leq \frac{1}{2}\|x\|_2^2 + \frac{1}{2}\|y\|_2^2$ , we have the upper bound of  $Q_1$  and  $Q_2$  as follows:

$$\begin{aligned}
 Q_1 &= \frac{L\gamma_t^2}{2} \mathbb{E} \left\| \sum_{k=1}^K \nabla f_{\mathcal{G}(k), x_{i(t-K+k)}}(w^{t-K+k}) - \nabla f(w^t) - \sum_{k=1}^K \nabla f_{\mathcal{G}(k)}(w^{t-K+k}) + \sum_{k=1}^K \nabla f_{\mathcal{G}(k)}(w^{t-K+k}) \right\|_2^2 \\
 &\leq L\gamma_t^2 \underbrace{\mathbb{E} \left\| \sum_{k=1}^K \nabla f_{\mathcal{G}(k), x_{i(t-K+k)}}(w^{t-K+k}) - \sum_{k=1}^K \nabla f_{\mathcal{G}(k)}(w^{t-K+k}) \right\|_2^2}_{Q_3} + L\gamma_t^2 \underbrace{\mathbb{E} \left\| \sum_{k=1}^K \nabla f_{\mathcal{G}(k)}(w^{t-K+k}) - \nabla f(w^t) \right\|_2^2}_{Q_4} \quad (3)
 \end{aligned}$$

$$\begin{aligned}
 Q_2 &= -(\gamma_t - L\gamma_t^2) \sum_{k=1}^K \nabla f(w^t)^T (\nabla f_{\mathcal{G}(k)}(w^{t-K+k}) - \nabla f_{\mathcal{G}(k)}(w^t)) \\
 &\leq \frac{\gamma_t - L\gamma_t^2}{2} \|\nabla f(w^t)\|_2^2 + \frac{\gamma_t - L\gamma_t^2}{2} \left\| \sum_{k=1}^K \nabla f_{\mathcal{G}(k)}(w^{t-K+k}) - \nabla f(w^t) \right\|_2^2. \quad (4)
 \end{aligned}$$

As per the equation regarding variance  $\mathbb{E}\|\xi - \mathbb{E}[\xi]\|_2^2 = \mathbb{E}\|\xi\|_2^2 - \|\mathbb{E}[\xi]\|_2^2$ , we can bound  $Q_3$  as follows:

$$\begin{aligned}
 Q_3 &= \mathbb{E} \left\| \sum_{k=1}^K \nabla f_{\mathcal{G}(k), x_{i(t-K+k)}}(w^{t-K+k}) - \sum_{k=1}^K \nabla f_{\mathcal{G}(k)}(w^{t-K+k}) \right\|_2^2 \\
 &= \sum_{k=1}^K \mathbb{E} \left\| \nabla f_{\mathcal{G}(k), x_{i(t-K+k)}}(w^{t-K+k}) - \nabla f_{\mathcal{G}(k)}(w^{t-K+k}) \right\|_2^2 \\
 &\leq \sum_{k=1}^K \mathbb{E} \left\| \nabla f_{\mathcal{G}(k), x_{i(t-K+k)}}(w^{t-K+k}) \right\|_2^2 \\
 &\leq KM, \quad (5)
 \end{aligned}$$

where the equality follows from the definition of  $\nabla f_{\mathcal{G}(k)}(w)$  such that  $[\nabla f_{\mathcal{G}(k)}(w)]_j = 0, \forall j \notin \mathcal{G}(k)$  and the last inequality is from Assumption 2. We can also get the upper bound of  $Q_4$ :

$$\begin{aligned}
 Q_4 &= \left\| \sum_{k=1}^K \nabla f_{\mathcal{G}(k)}(w^{t-K+k}) - \nabla f(w^t) \right\|_2^2 \\
 &= \sum_{k=1}^K \left\| \nabla f_{\mathcal{G}(k)}(w^{t-K+k}) - \nabla f_{\mathcal{G}(k)}(w^t) \right\|_2^2 \\
 &\leq \sum_{k=1}^K \left\| \nabla f(w^{t-K+k}) - \nabla f(w^t) \right\|_2^2 \\
 &\leq L^2 \sum_{k=1}^K \left\| \sum_{j=\max\{0, t-K+k\}}^{t-1} (w^{j+1} - w^j) \right\|_2^2 \\
 &\leq L^2 \gamma_{\max\{0, t-K+1\}}^2 K \sum_{k=1}^K \sum_{j=\max\{0, t-K+k\}}^{t-1} \left\| \sum_{k=1}^K \nabla f_{\mathcal{G}(k), x_{(j)}}(w^{j-K+k}) \right\|_2^2 \\
 &\leq KL\gamma_t \frac{\gamma_{\max\{0, t-K+1\}}}{\gamma_t} \sum_{k=1}^K \sum_{j=\max\{0, t-K+k\}}^{t-1} \left\| \sum_{k=1}^K \nabla f_{\mathcal{G}(k), x_{(j)}}(w^{j-K+k}) \right\|_2^2 \\
 &\leq L\gamma_t \sigma K^4 M, \quad (6)
 \end{aligned}$$

where the second inequality is from Assumption 1, the fourth inequality follows from that  $L\gamma_t \leq 1$  and the last inequality follows from  $\|z_1 + \dots + z_r\|_2^2 \leq r(\|z_1\|_2^2 + \dots + \|z_r\|_2^2)$ , Assumption 2 and  $\sigma := \max_t \frac{\gamma_{\max\{0, t-K+1\}}}{\gamma_t}$ . Integrating the upper bound of  $Q_1, Q_2, Q_3$  and  $Q_4$  in (2), we have:

$$\begin{aligned} \mathbb{E} [f(w^{t+1})] - f(w^t) &\leq -\frac{\gamma_t}{2} \|\nabla f(w^t)\|_2^2 + \gamma_t^2 L \sum_{k=1}^K \mathbb{E} \left\| \nabla f_{\mathcal{G}(k), x_i(t-K+k)}(w^{t-K+k}) \right\|_2^2 \\ &\quad + \frac{\gamma_t + L\gamma_t^2}{2} \left\| \sum_{k=1}^K \nabla f_{\mathcal{G}(k)}(w^{t-K+k}) - \nabla f(w^t) \right\|_2^2 \\ &\leq -\frac{\gamma_t}{2} \|\nabla f(w^t)\|_2^2 + \gamma_t^2 LM_K, \end{aligned} \quad (7)$$

where we let  $M_K = KM + \sigma K^4 M$ .

## B. Proof to Theorem 1

*Proof:* When  $\gamma_t$  is constant and  $\gamma_t = \gamma$ , taking total expectation of (12) in Lemma 1, we obtain:

$$\mathbb{E} [f(w^{t+1})] - \mathbb{E} [f(w^t)] \leq -\frac{\gamma}{2} \mathbb{E} \|\nabla f(w^t)\|_2^2 + \gamma^2 LM_K, \quad (8)$$

where  $\sigma = 1$  and  $M_K = KM + K^4 M$ . Summing (8) from  $t = 0$  to  $T - 1$ , we have:

$$\mathbb{E} [f(w^T)] - f(w^0) \leq -\frac{\gamma}{2} \sum_{t=0}^{T-1} \mathbb{E} \|\nabla f(w^t)\|_2^2 + T\gamma^2 LM_K. \quad (9)$$

Suppose  $w^*$  is the optimal solution for  $f(w)$ , therefore  $f(w^*) - f(w^0) \leq \mathbb{E} [f(w^T)] - f(w^0)$ . Above all, the following inequality is guaranteed that:

$$\frac{1}{T} \sum_{t=0}^{T-1} \mathbb{E} \|\nabla f(w^t)\|_2^2 \leq \frac{2(f(w^0) - f(w^*))}{\gamma T} + 2\gamma LM_K. \quad (10)$$

## C. Proof to Theorem 2

*Proof:*  $\{\gamma_t\}$  is a diminishing sequence and  $\gamma_t = \frac{\gamma_0}{1+t}$ , such that  $\sigma \leq K$  and  $M_K = KM + K^5 M$ . Taking total expectation of (12) in Lemma 1 and summing it from  $t = 0$  to  $T - 1$ , we obtain:

$$\mathbb{E} [f(w^T)] - f(w^0) \leq -\frac{1}{2} \sum_{t=0}^{T-1} \gamma_t \mathbb{E} \|\nabla f(w^t)\|_2^2 + \sum_{t=0}^{T-1} \gamma_t^2 LM_K. \quad (11)$$

Suppose  $w^*$  is the optimal solution for  $f(w)$ , therefore  $f(w^*) - f(w^0) \leq \mathbb{E} [f(w^T)] - f(w^0)$ . Letting  $\Gamma_T = \sum_{t=0}^{T-1} \gamma_t$ , we have:

$$\frac{1}{\Gamma_T} \sum_{t=0}^{T-1} \gamma_t \mathbb{E} \|\nabla f(w^t)\|_2^2 \leq \frac{2(f(w^0) - f(w^*))}{\Gamma_T} + \frac{2 \sum_{t=0}^{T-1} \gamma_t^2 LM_K}{\Gamma_T}. \quad (12)$$

We complete the proof.
